# Supplementary material for: Triboelectric Enhancement of Polyvinylidene Fluoride Membrane Using Magnetic Nanoparticle for Water-Based Energy Harvesting
Source: MDPI journal article supplement (doi:10.3390/polym14081547), 2022-04-11
Supplement: s1 [file s1]

Supplementary Material

# Triboelectric Enhancement of Polyvinylidene Fluoride Mem-brane Using Magnetic Nanoparticle for Water-Based Energy Harvesting

Duy Linh Vu and Kyoung Kwan Ahn \*

Fluid Power & Machine Intelligence (FPMI) Laboratory, School of Mechanical Engineering, University of Ulsan, 93, Daehak-ro, Nam-gu, Ulsan 44610, South Korea; vuduylinhbk@gmail.com (D.L.V); kkahn@ulsan.ac.kr (K.K.A)

\* Correspondence: kkahn@ulsan.ac.kr

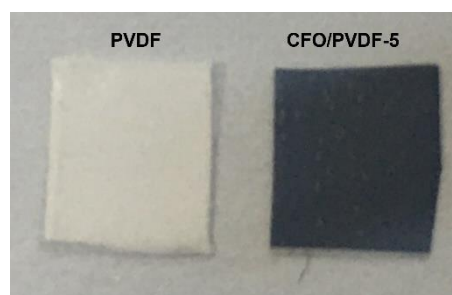

Figure S1. Photography of the PVDF and CFO/PVDF-5 membrane

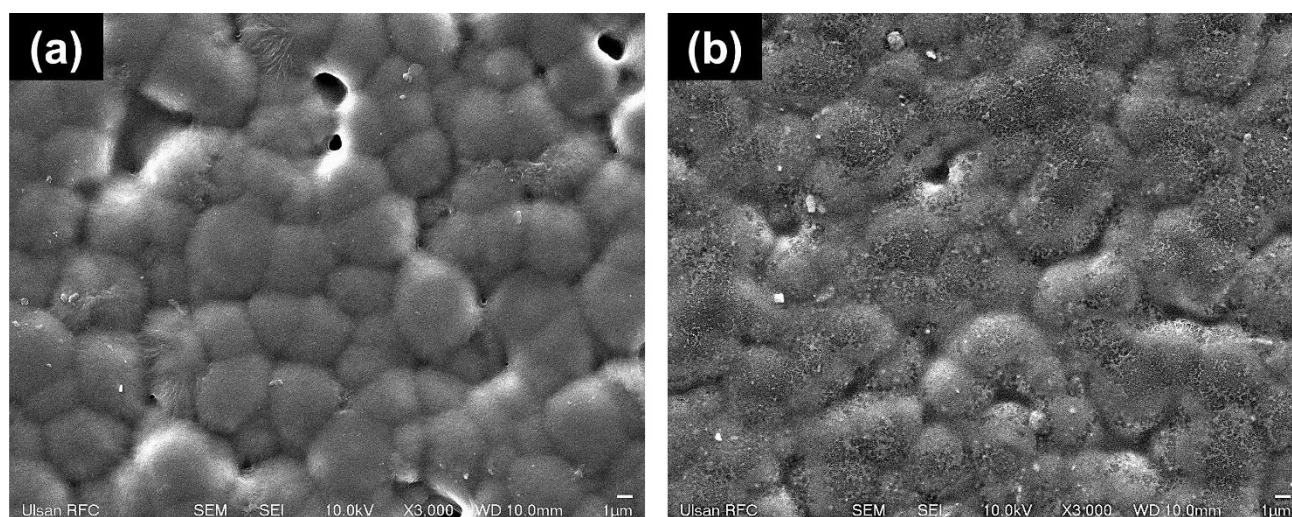

Figure S2. FE-SEM image of (a) PVDF and (b) CFO/PVDF-5 membrane

| Sample1_PVDF membrane (a) |                    |                    | Sample2_CFO/PVDF-5 membrane (b) |                    |                    |
|---------------------------|--------------------|--------------------|---------------------------------|--------------------|--------------------|
| RoughnessData:            |                    |                    | RoughnessData:                  |                    |                    |
| Parameter                 | Full Image Values: | Mask Image Values: | Parameter                       | Full Image Values: | Mask Image Values: |
| Number Of Points:         | 262144             |                    | Number Of Points:               | 262144             |                    |
| Average:                  | -0.000 m           |                    | Average:                        | -0.000 m           |                    |
| Standard Deviation (Rq):  | 162.962 nm         |                    | Standard Deviation (Rq):        | 161.108 nm         |                    |
| Max:                      | 465.558 nm         |                    | Max:                            | 385.066 nm         |                    |
| Min:                      | -573.578 nm        |                    | Min:                            | -538.229 nm        |                    |
| RMS:                      | 162.961 nm         |                    | RMS:                            | 161.108 nm         |                    |
| Average Deviation (Ra):   | 133.855 nm         |                    | Average Deviation (Ra):         | 127.626 nm         |                    |
| Skew:                     | -0.14              |                    | Skew:                           | -0.345             |                    |
| Kurtosis:                 | -0.464             |                    | Kurtosis:                       | 0.0483             |                    |
| Percent XY:               | 100 %              |                    | Percent XY:                     | 100 %              |                    |
| Surface Area:             | 410.0              |                    | Surface Area:                   | 406.9              |                    |
| Area Percent:             | 2.492 %            |                    | Area Percent:                   | 1.732 %            |                    |
| Volume                    | -0.0               |                    | Volume                          | -0.0               |                    |

**Figure S3.** The measurement parameter of (a) PVDF and (b) CFO/PVDF-5 membrane in AFM image
